# Supplementary material for: Synthesis of Metalorganic Copolymers Containing Various Contorted Units and Iron(II) Clathrochelates with Lateral Butyl Chains: Conspicuous Adsorbents of Lithium Ions and Methylene Blue
Source: MDPI journal article supplement (doi:10.3390/polym14163394), 2022-08-19
Supplement: s1 [file s1]

## Supporting Information

### Synthesis of Metalorganic Copolymers Containing Various Contorted Units and Iron (II) Clathrochelates with Lateral Butyl Chains: Conspicuous Adsorbents of Lithium Ions and Methylene Blue

*Suchetha Shetty,<sup>1,2</sup> Noorullah Baig,<sup>1,2</sup> Moustafa Sherief Moustafa<sup>3</sup>, Saleh Al-Mousawi,<sup>3</sup> and Bassam Alameddine<sup>\*1,2</sup>*

<sup>1,2</sup> Suchetha Shetty, Noorullah Baig, and Bassam Alameddine

<sup>1</sup>Department of Mathematics and Natural Sciences, Gulf University for Science and Technology, Kuwait.

<sup>2</sup>Functional Materials Group – GUST, Kuwait.

E-mail: [alameddine.b@gust.edu.kw](mailto:alameddine.b@gust.edu.kw)

<sup>3</sup> Moustafa Sherief Moustafa and Saleh Al-Mousawi,

<sup>3</sup>Department of Chemistry, Kuwait University, Kuwait.

#### Contents

|                                                                                                                            |                       |
|----------------------------------------------------------------------------------------------------------------------------|-----------------------|
| <b><sup>1</sup>H-NMR spectra of TC1-3, TCP1-3 and OTCP1-3</b>                                                              | <b>Figure S1-S9</b>   |
| <b><sup>13</sup>C-NMR spectra of TC1-3, TCP1-3 and OTCP1-3</b>                                                             | <b>Figure S10-S18</b> |
| <b>EI-HRMS spectra of TC1-3</b>                                                                                            | <b>Figure S19-S21</b> |
| <b>Comparative FTIR spectra of TCP1-3 and OTCP1-3</b>                                                                      | <b>Figure S22-S24</b> |
| <b>High-resolution XPS spectra of TCP1-3 and OTCP1-3</b>                                                                   | <b>Figure S25-S30</b> |
| <b>Normalized GPC chromatogram of TCP1-3, OTCP1</b>                                                                        | <b>Figure S31-S34</b> |
| <b>Summary of the Li<sup>+</sup> adsorption by TCP1-3, OTCP1-3</b>                                                         | <b>Table S1</b>       |
| <b>Comparison table for Li<sup>+</sup> adsorption capacity of OTCP2 and various adsorbents published in the literature</b> | <b>Table S2</b>       |
| <b>Comparison table for MEB adsorption capacity of OTCP2 and various adsorbents published in the literature</b>            | <b>Table S3</b>       |
| <b>Nonlinear Langmuir and Freundlich isotherm models</b>                                                                   |                       |

of Li<sup>+</sup> on OTCP2

Figure S35

Nonlinear Langmuir and Freundlich isotherm models

of MEB on OTCP2

Figure S36

Nonlinear Pseudo first- and second-order models

of MEB on OTCP2

Figure S37

Regeneration tests results of OTCP2 to adsorb MEB

Figure S38

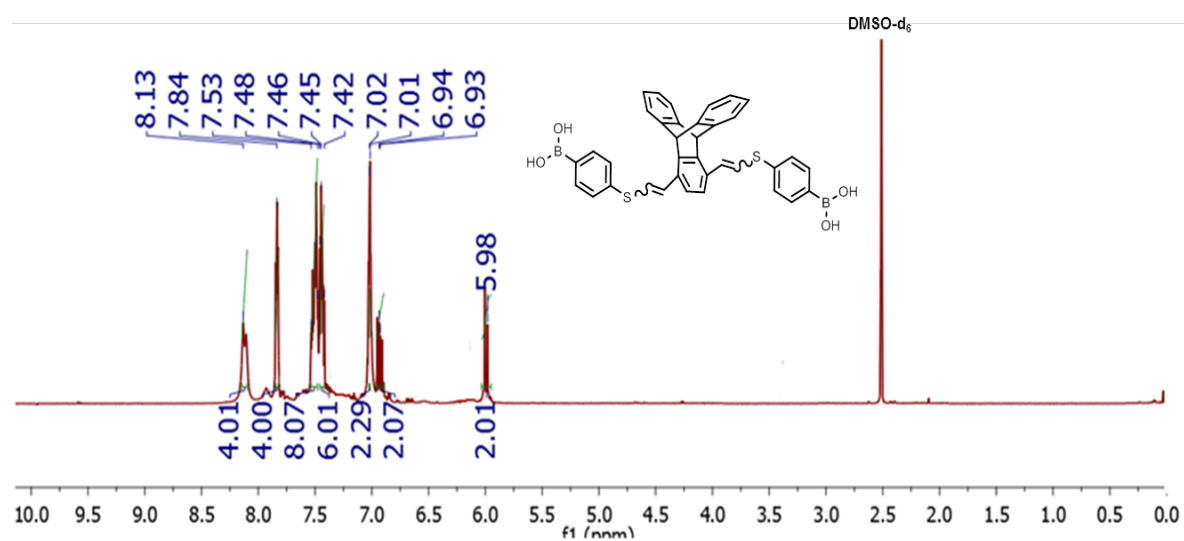

Figure S1 <sup>1</sup>H NMR spectrum of TC1

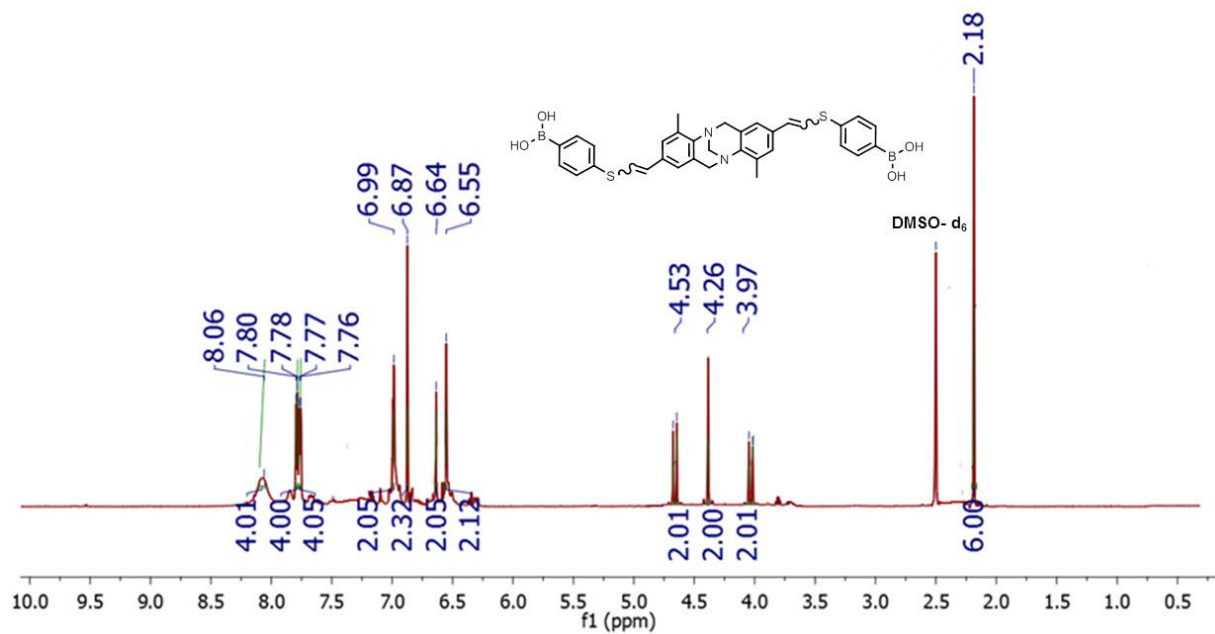

Figure S2  $^1\text{H}$  NMR spectrum of TC2

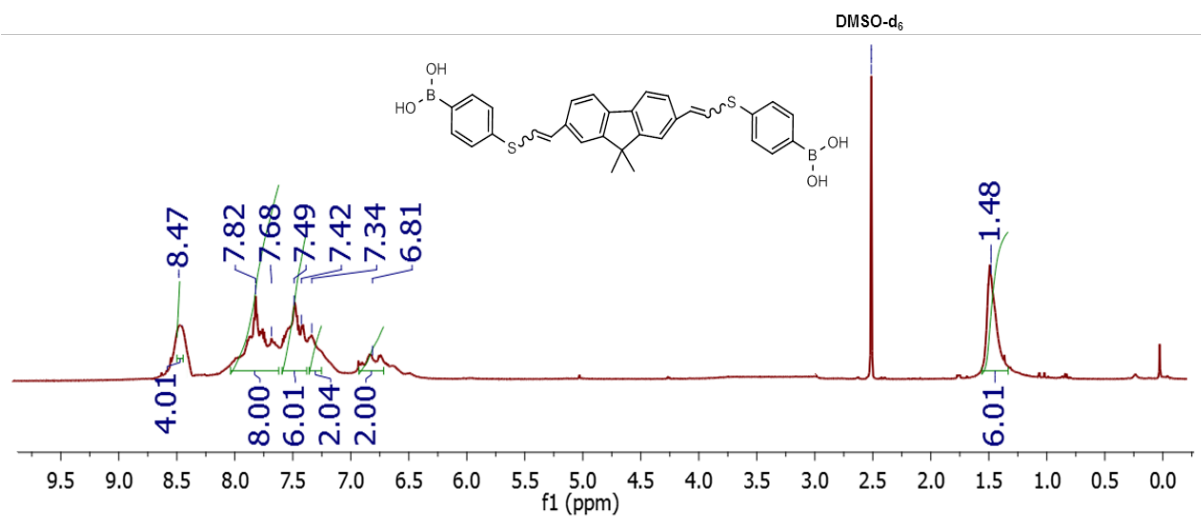

Figure S3  $^1\text{H}$  NMR spectrum of TC3

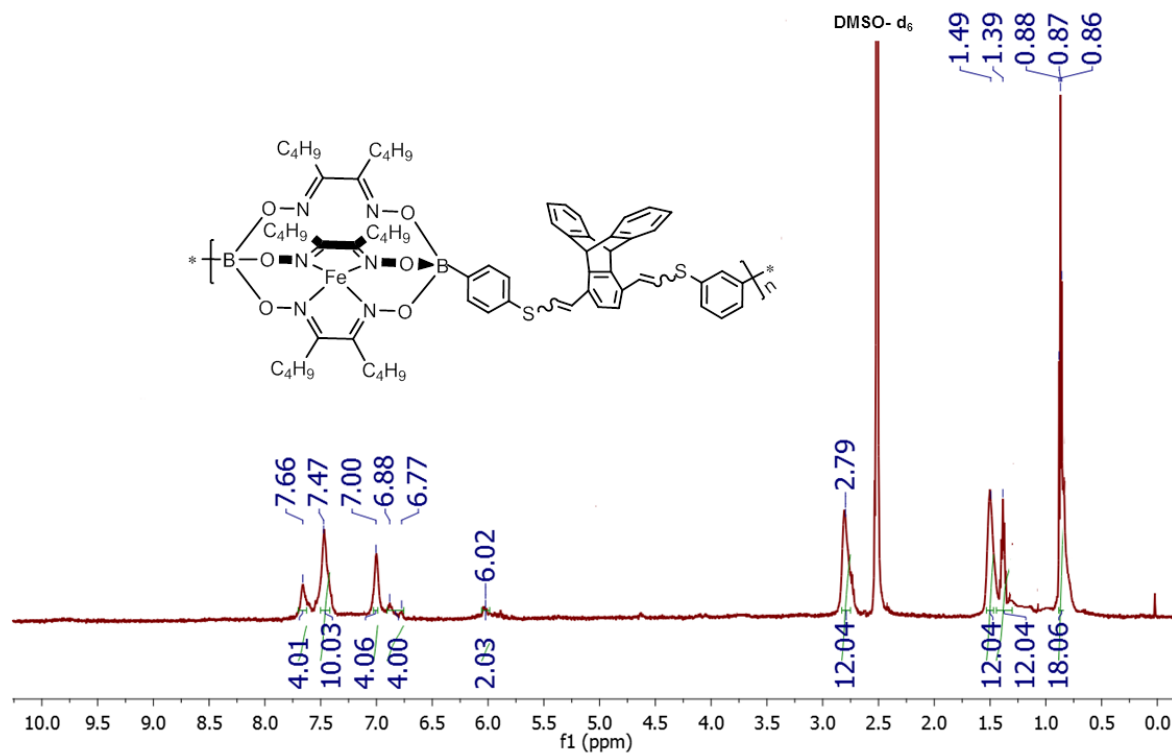

**Figure S4** <sup>1</sup>H NMR spectrum of TCP1

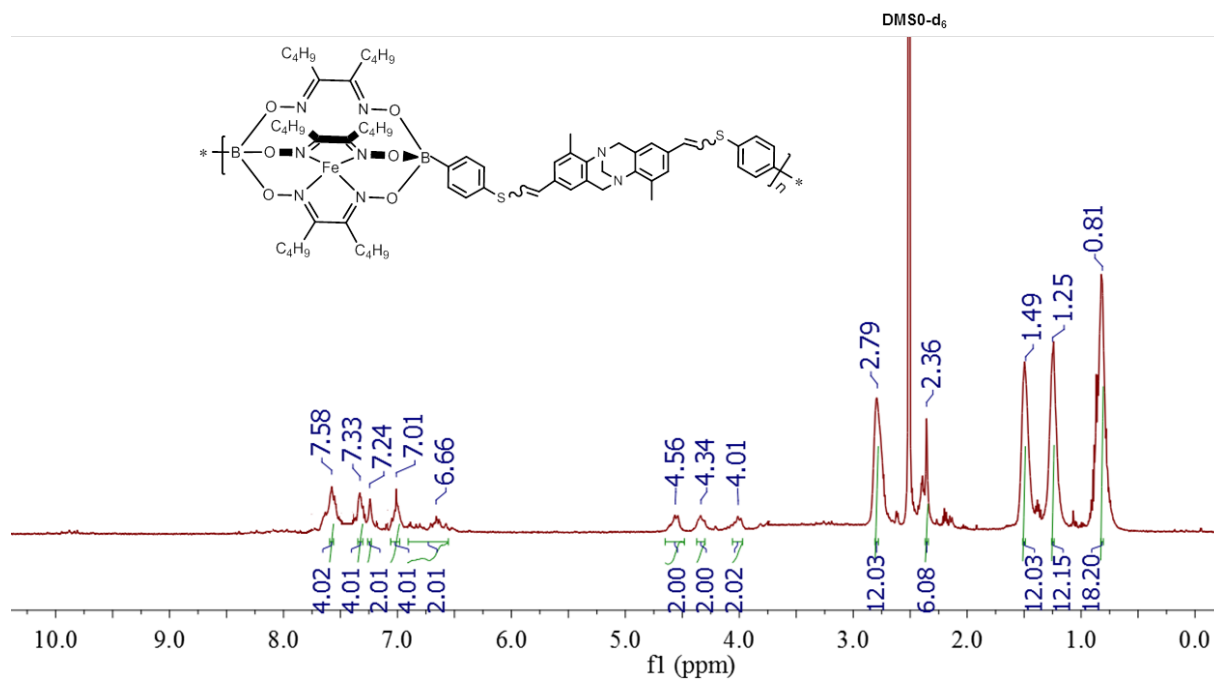

**Figure S5** <sup>1</sup>H NMR spectrum of TCP2

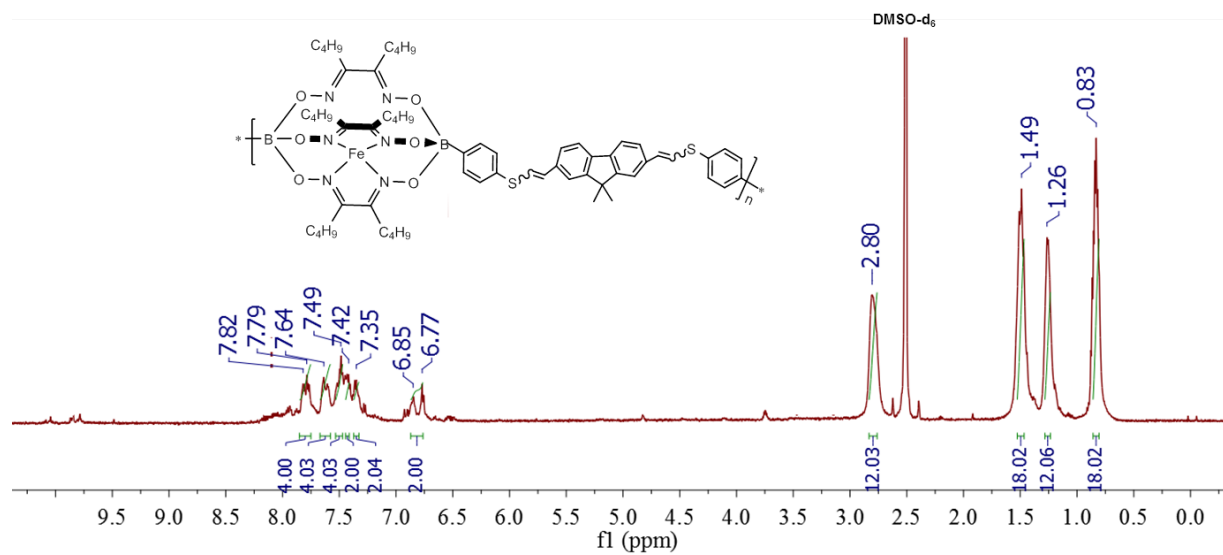

Figure S6 <sup>1</sup>H NMR spectrum of TCP3

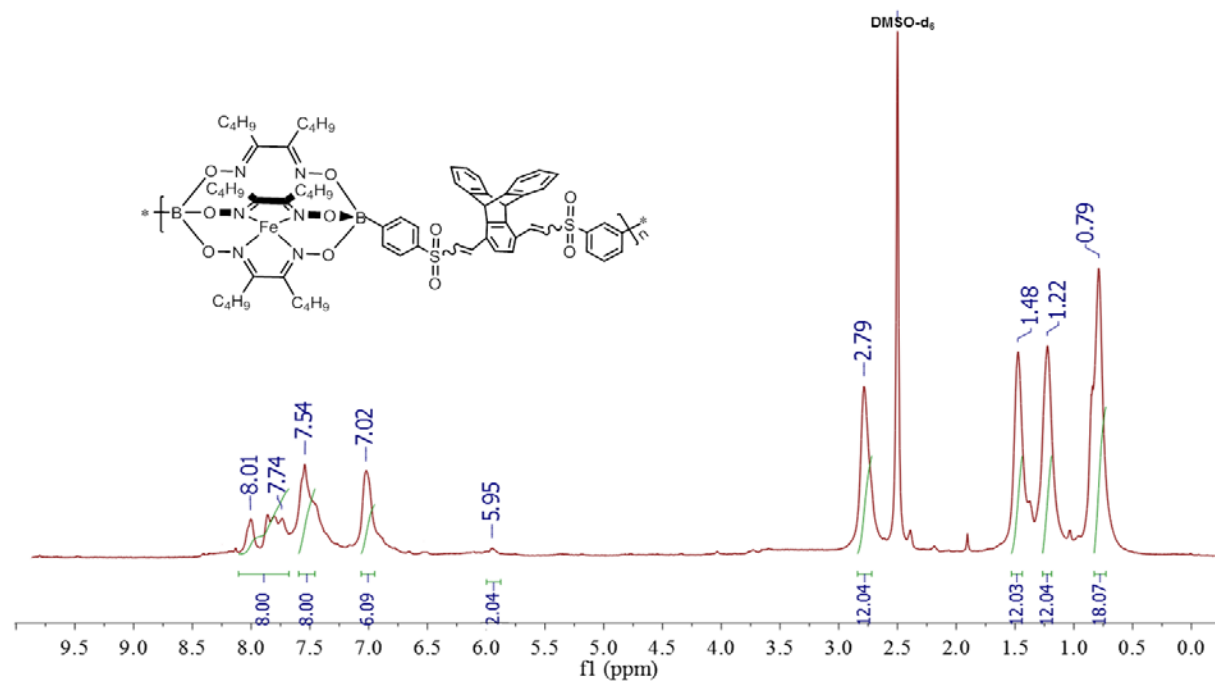

Figure S7 <sup>1</sup>H NMR spectrum of OTCP1

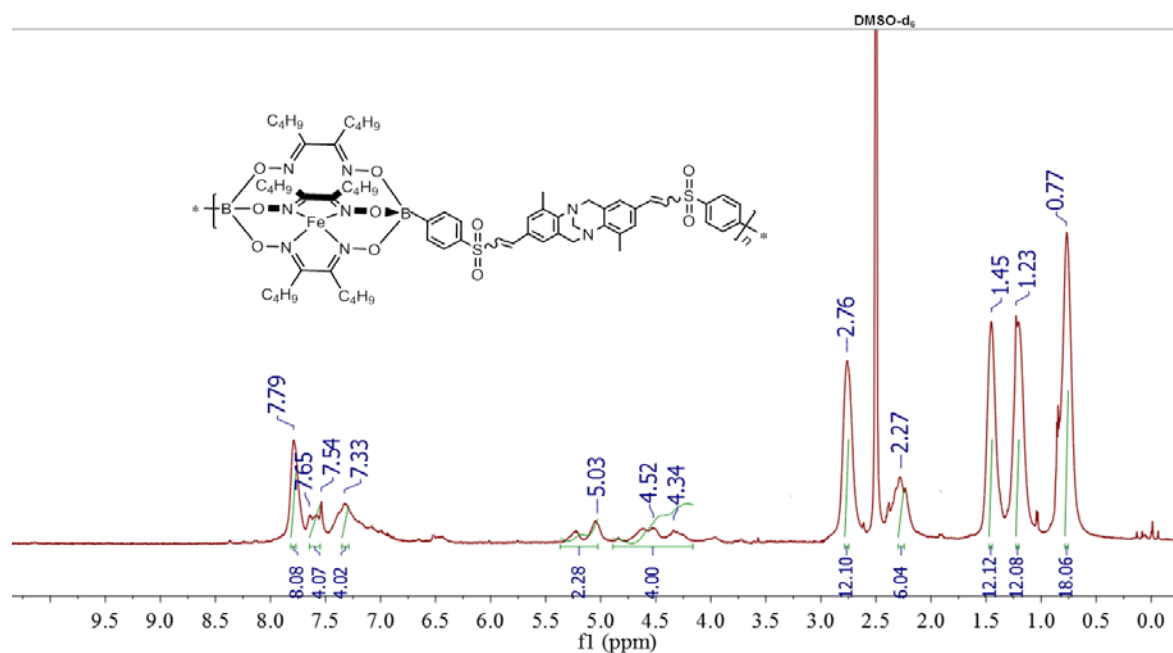

Figure S8 <sup>1</sup>H NMR spectrum of OTCP2

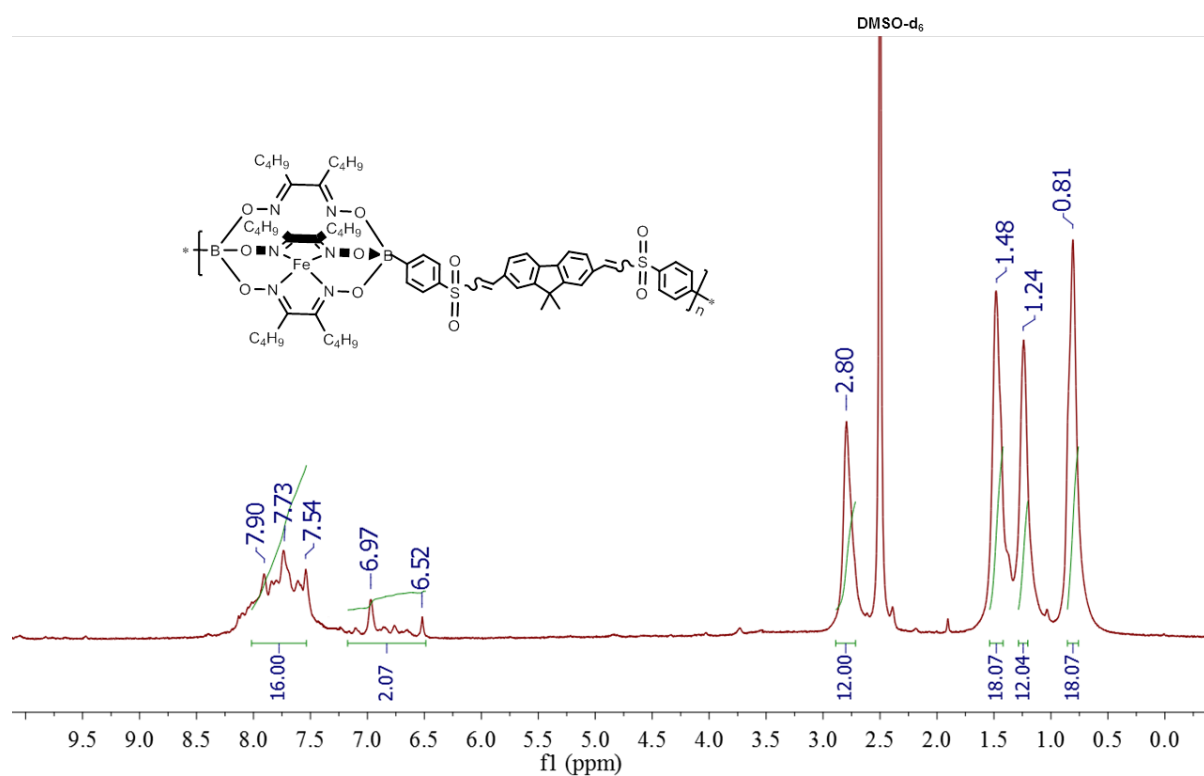

Figure S9 <sup>1</sup>H NMR spectrum of OTCP3

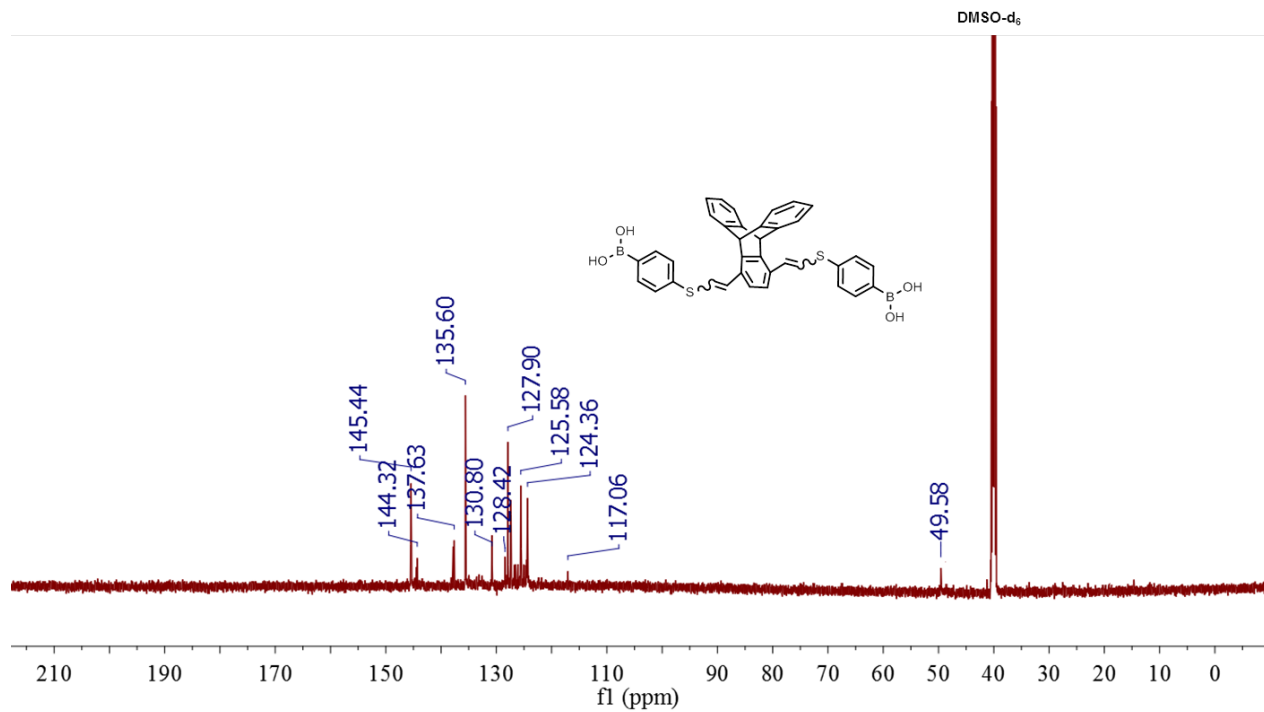

**Figure S10**  $^{13}\text{C}$  NMR spectrum of **TC1**

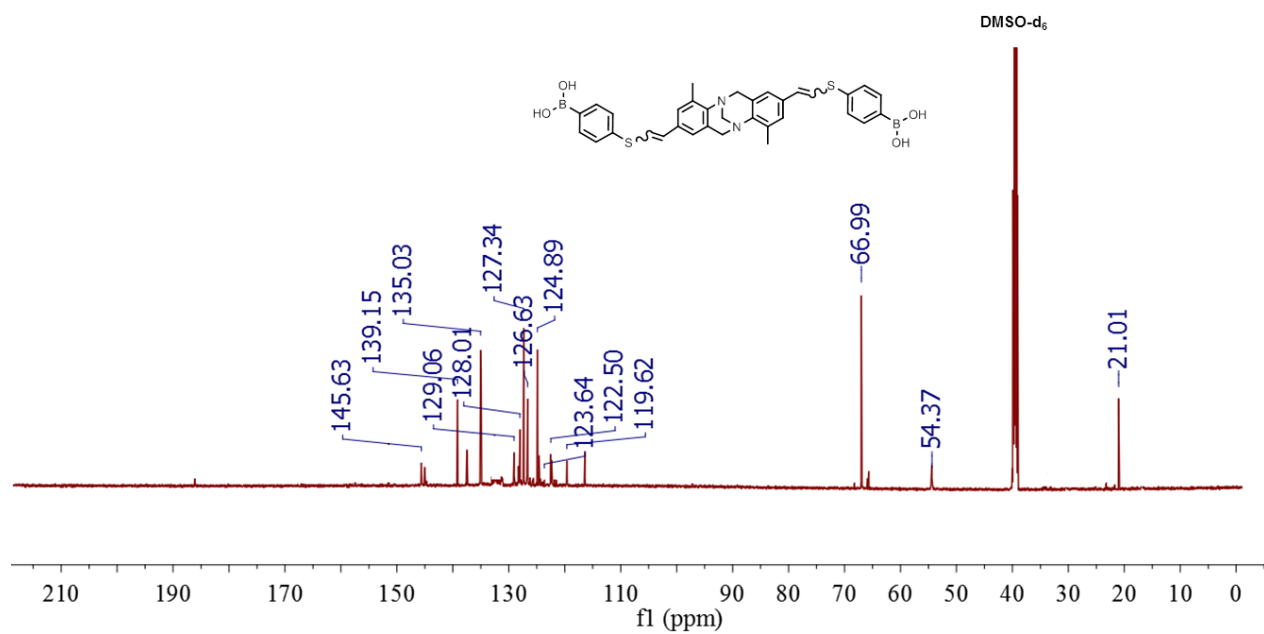

**Figure S11**  $^{13}\text{C}$  NMR spectrum of **TC2**

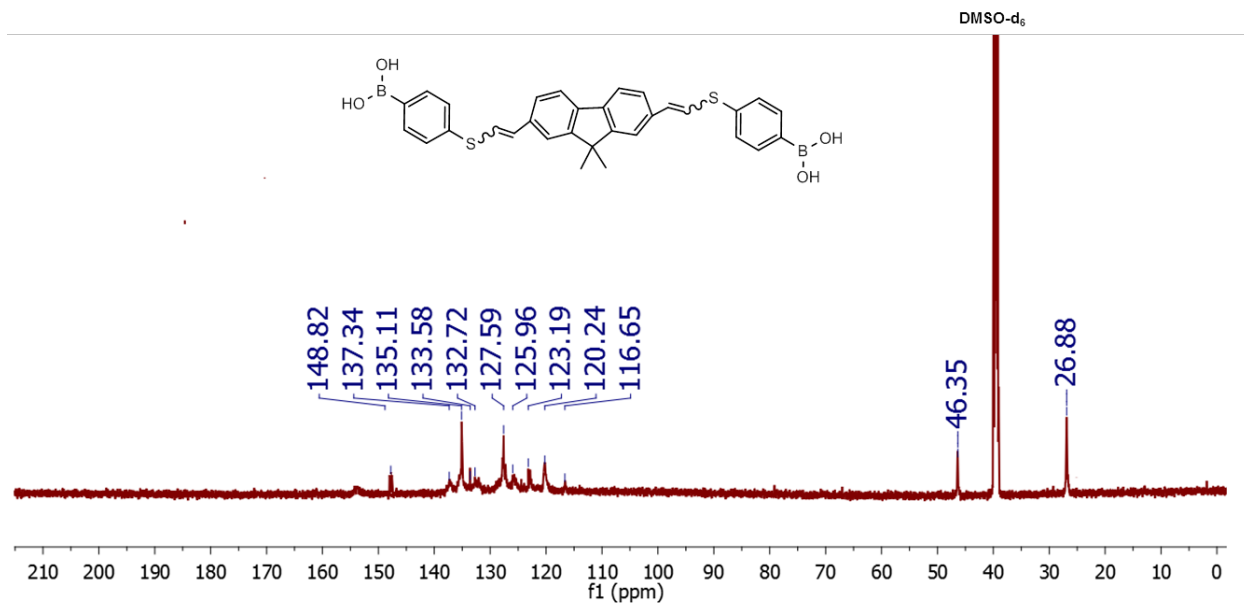

Figure S12 <sup>13</sup>C NMR spectrum of TC3

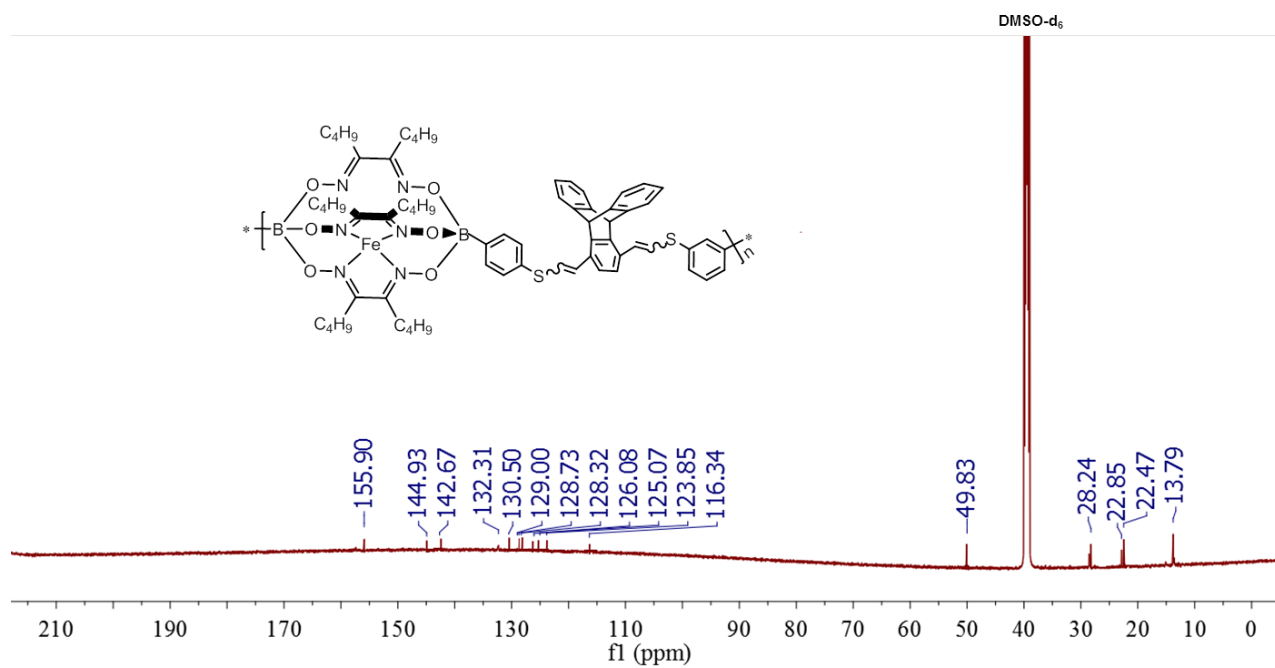

Figure S13 <sup>13</sup>C NMR spectrum of TCP1



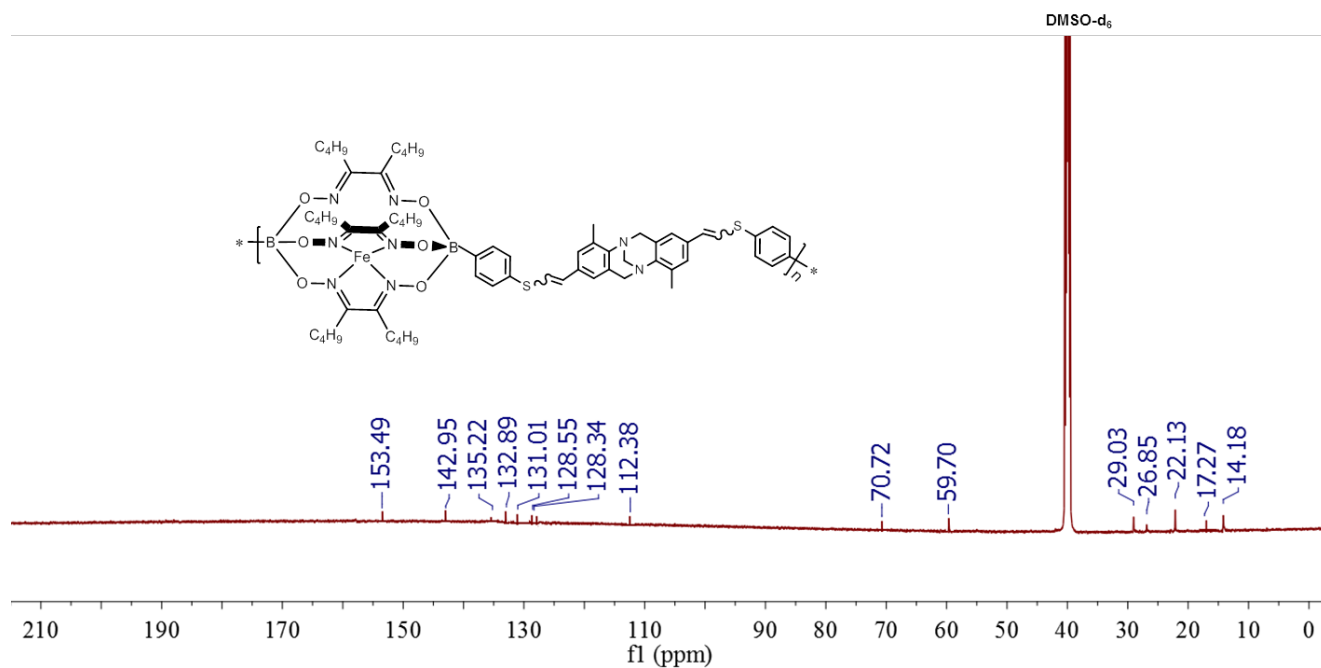

**Figure S14** <sup>13</sup>C NMR spectrum of TCP2

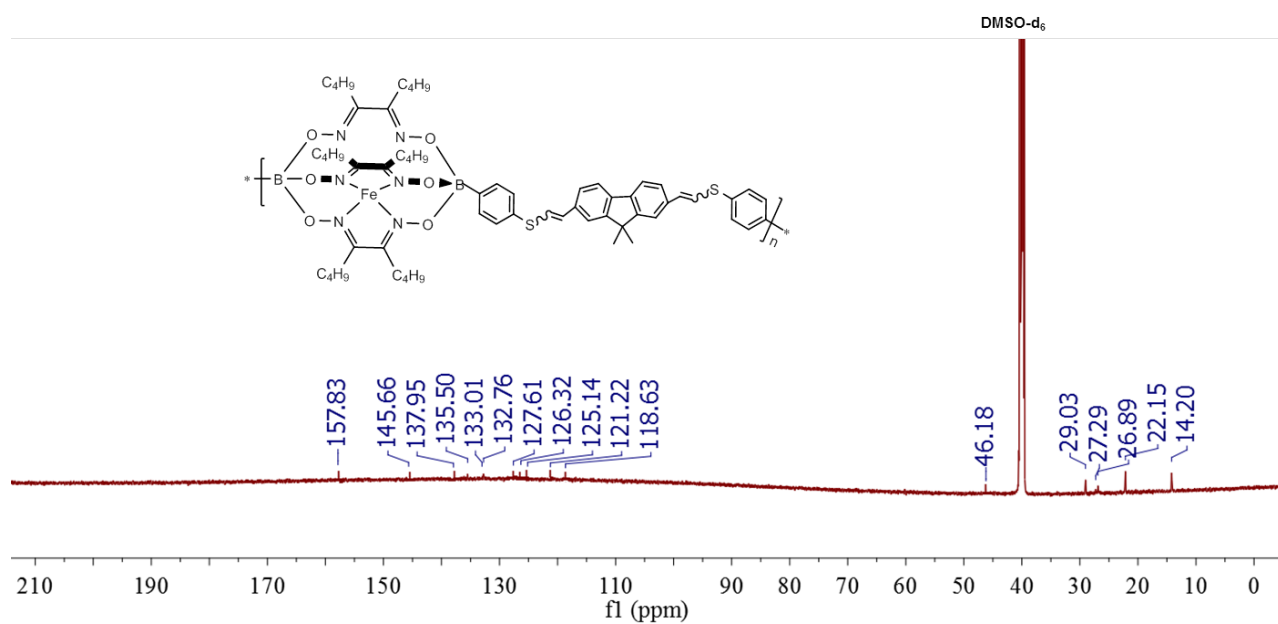

**Figure S15** <sup>13</sup>C NMR spectrum of TCP3

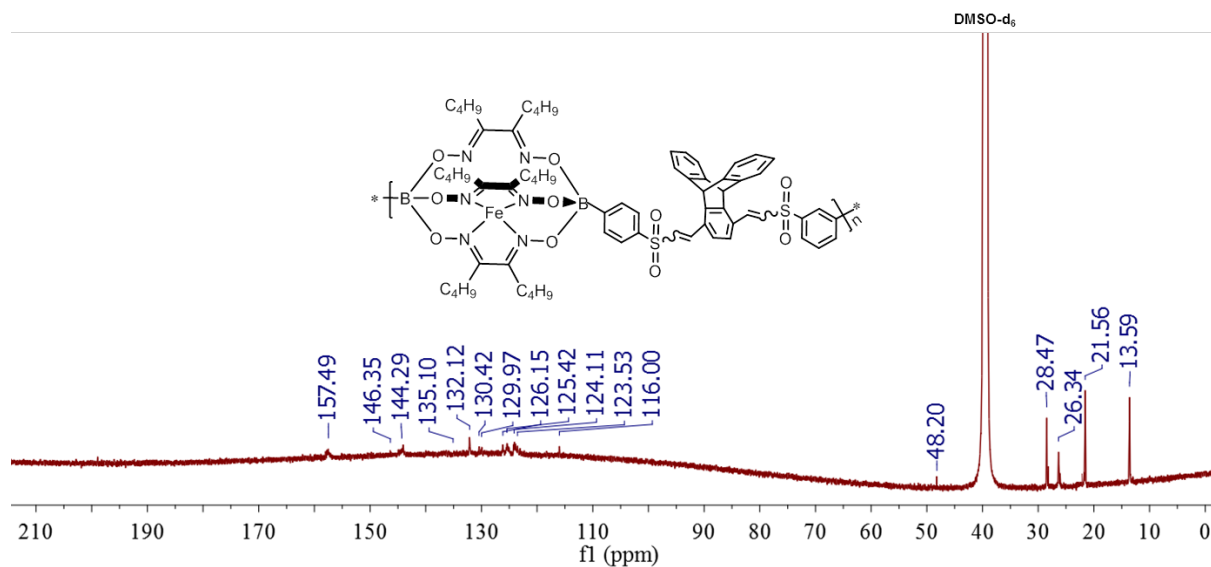

**Figure S16** <sup>13</sup>C NMR spectrum of OTCP1

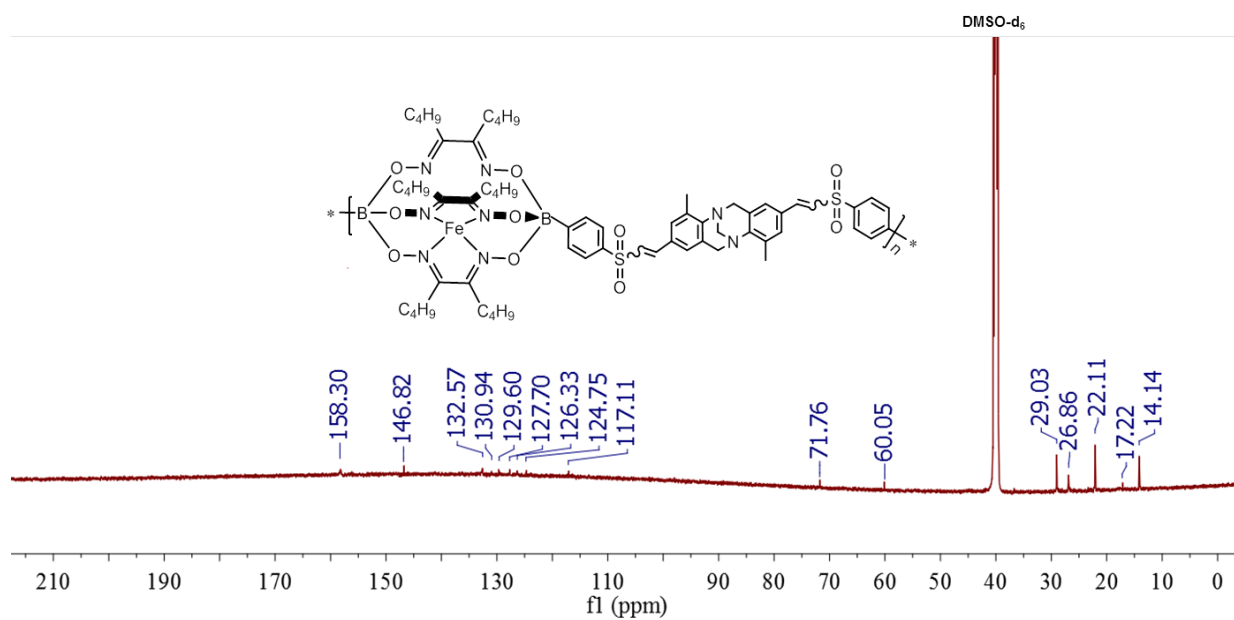

**Figure S17** <sup>13</sup>C NMR spectrum of OTCP2

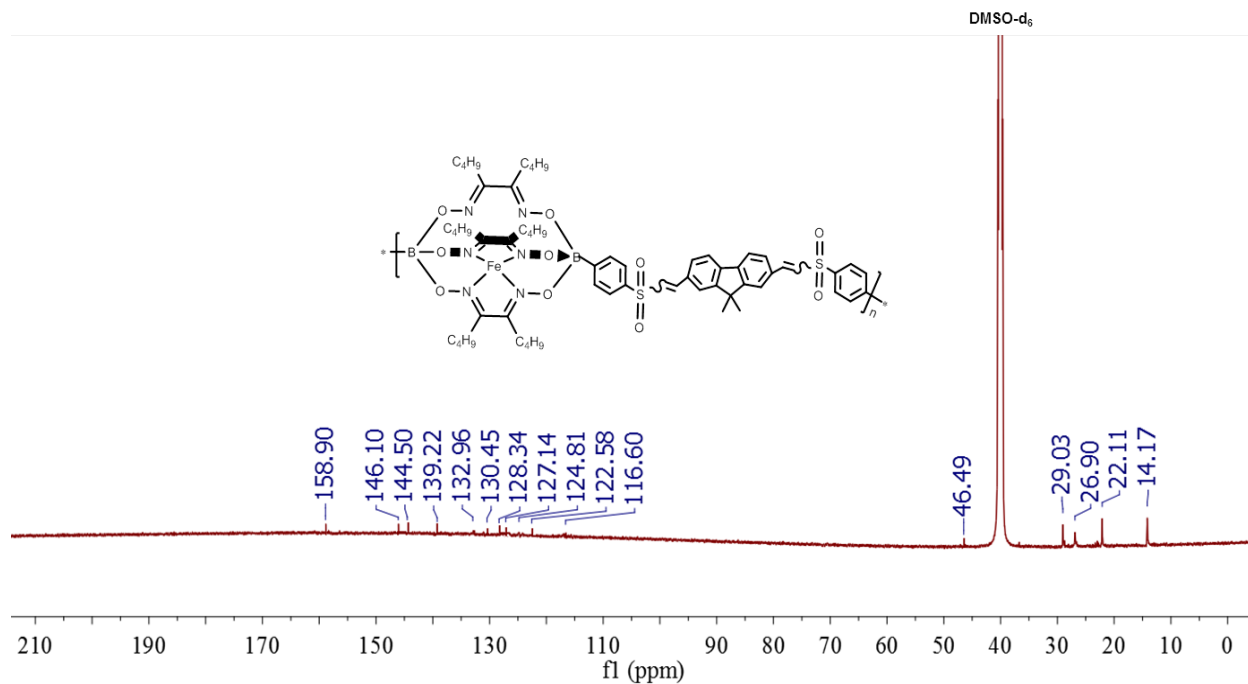

**Figure S18** <sup>13</sup>C NMR spectrum of OTCP3

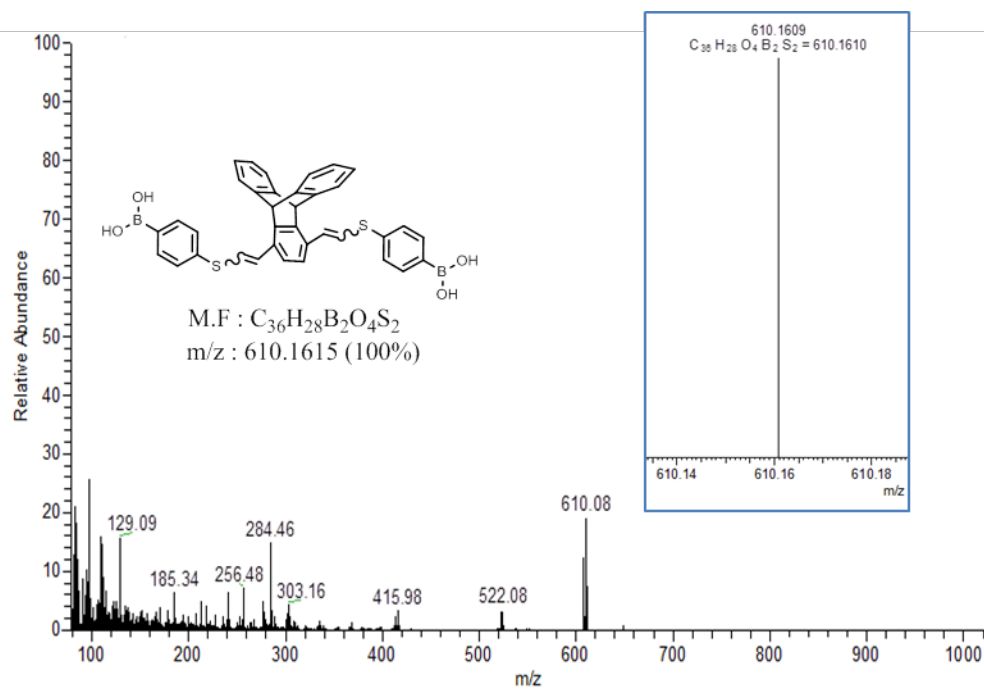

**Figure S19** EI-HRMS spectrum of TC1

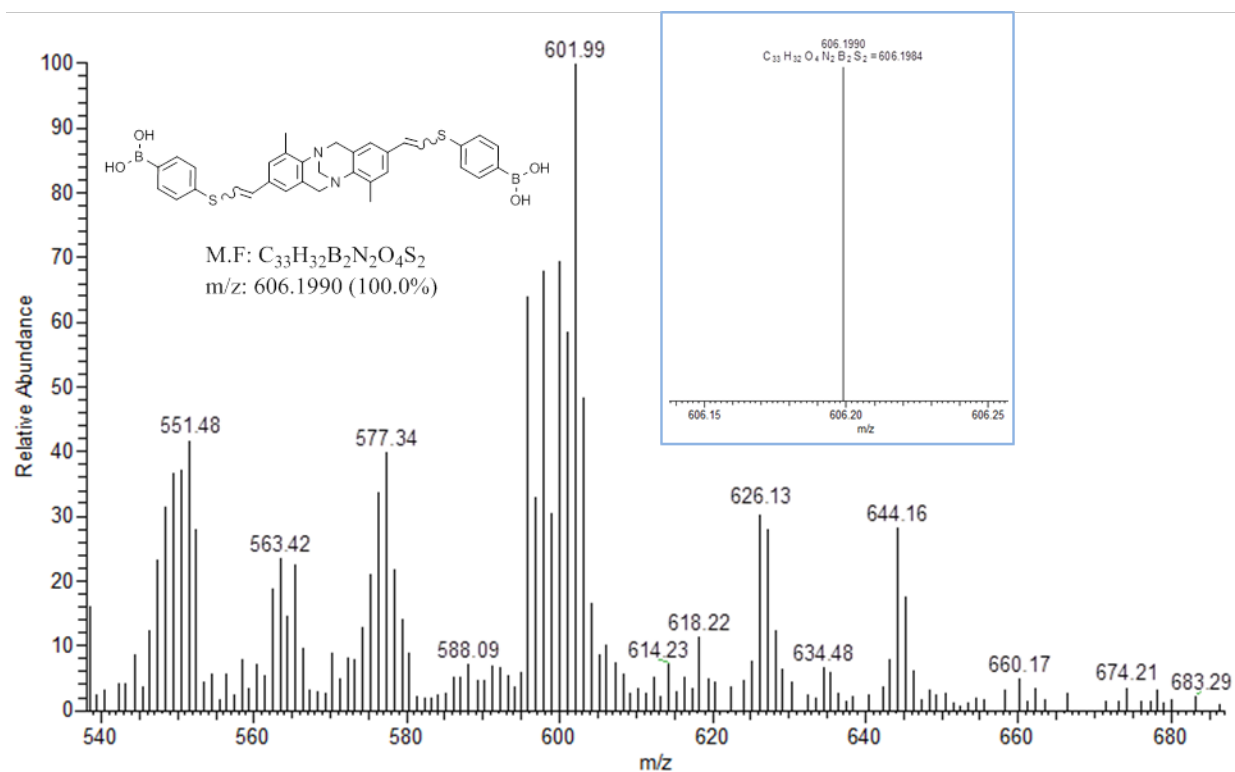

Figure S20 EI-HRMS spectrum of TC2

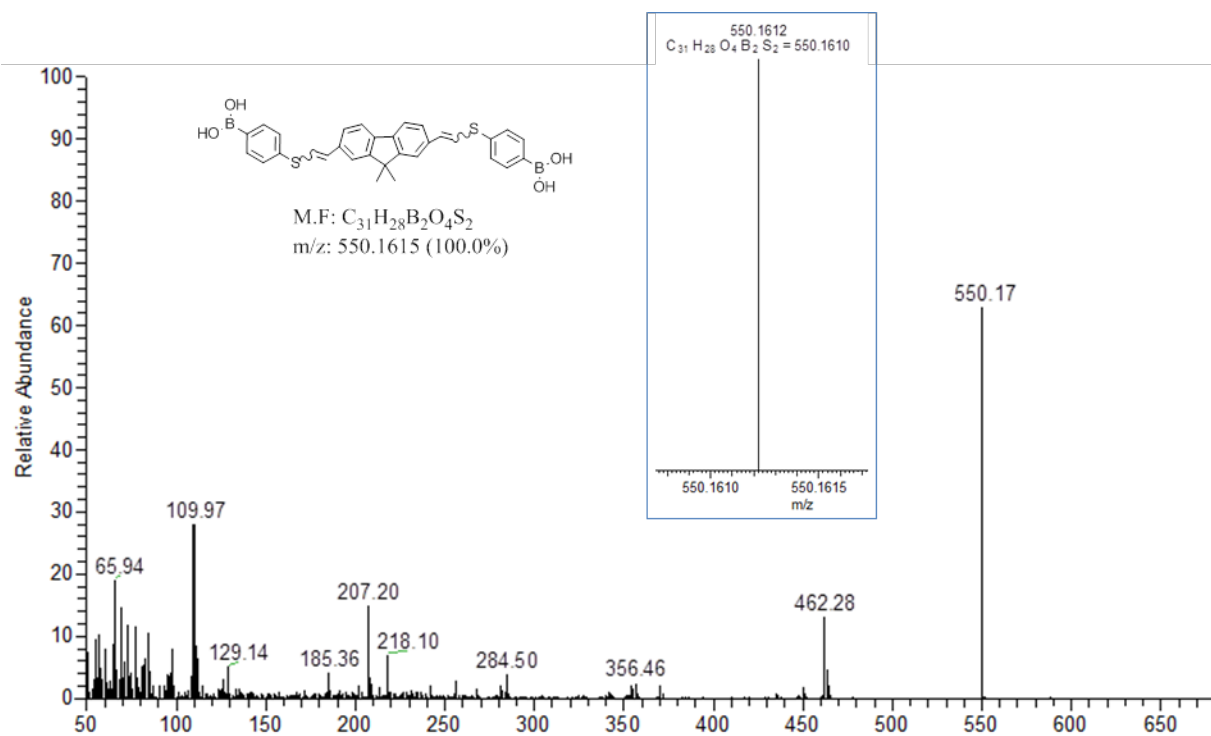

Figure S21 EI-HRMS spectrum of TC3

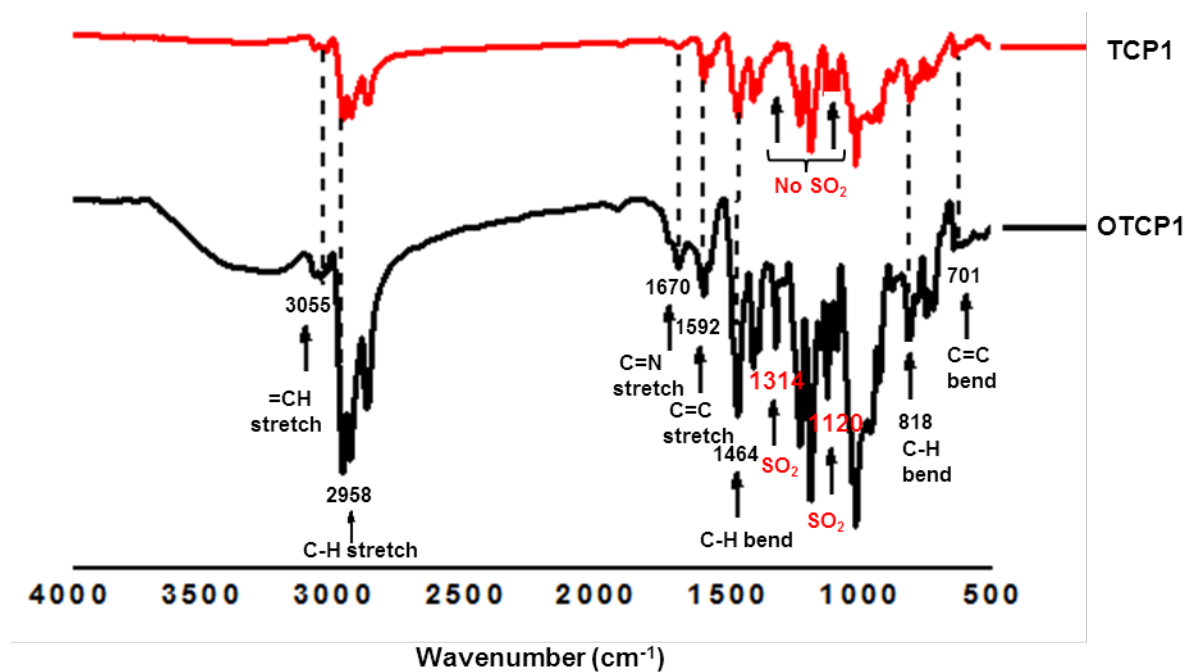

Figure S22 Comparative FTIR spectrum of TCP1 (up) and OTCP1 (down)

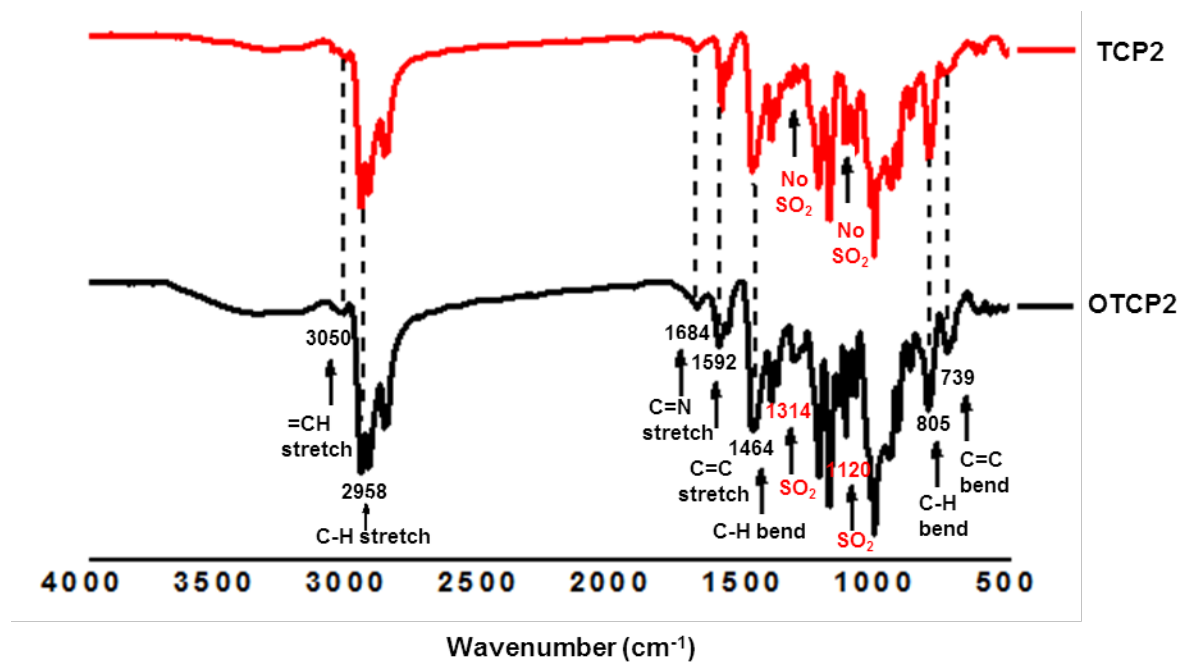

Figure S23 Comparative FTIR spectrum of TCP2 (up) and OTCP2 (down)

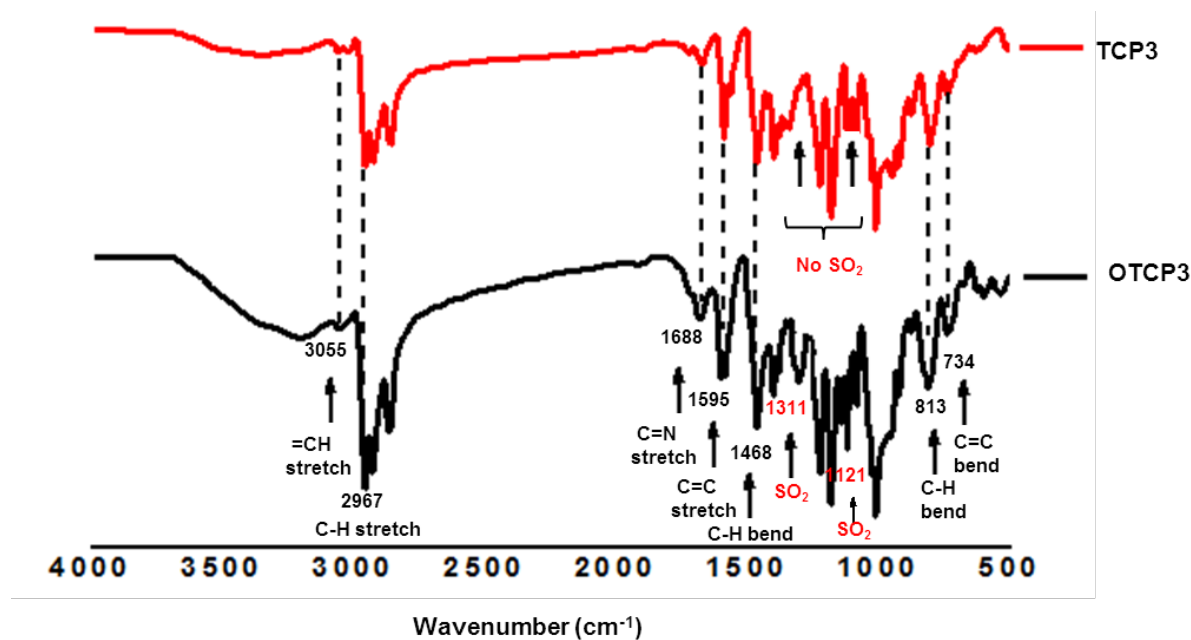

**Figure S24** Comparative FTIR spectrum of **TCP3** (up) and **OTCP3** (down)

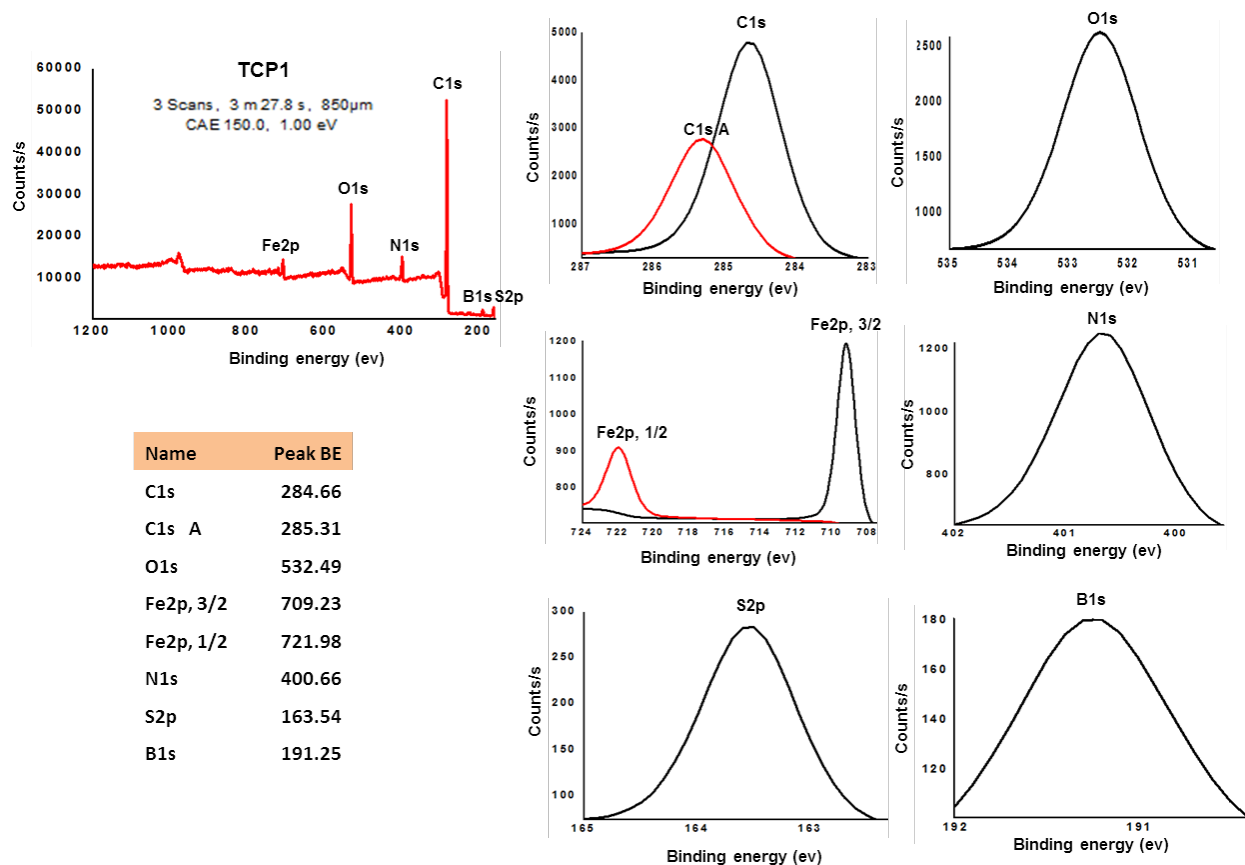

**Figure 25** High-resolution XPS spectra of C1s, O1s, Fe2p, N1s, S2p and B1s of **TCP1**

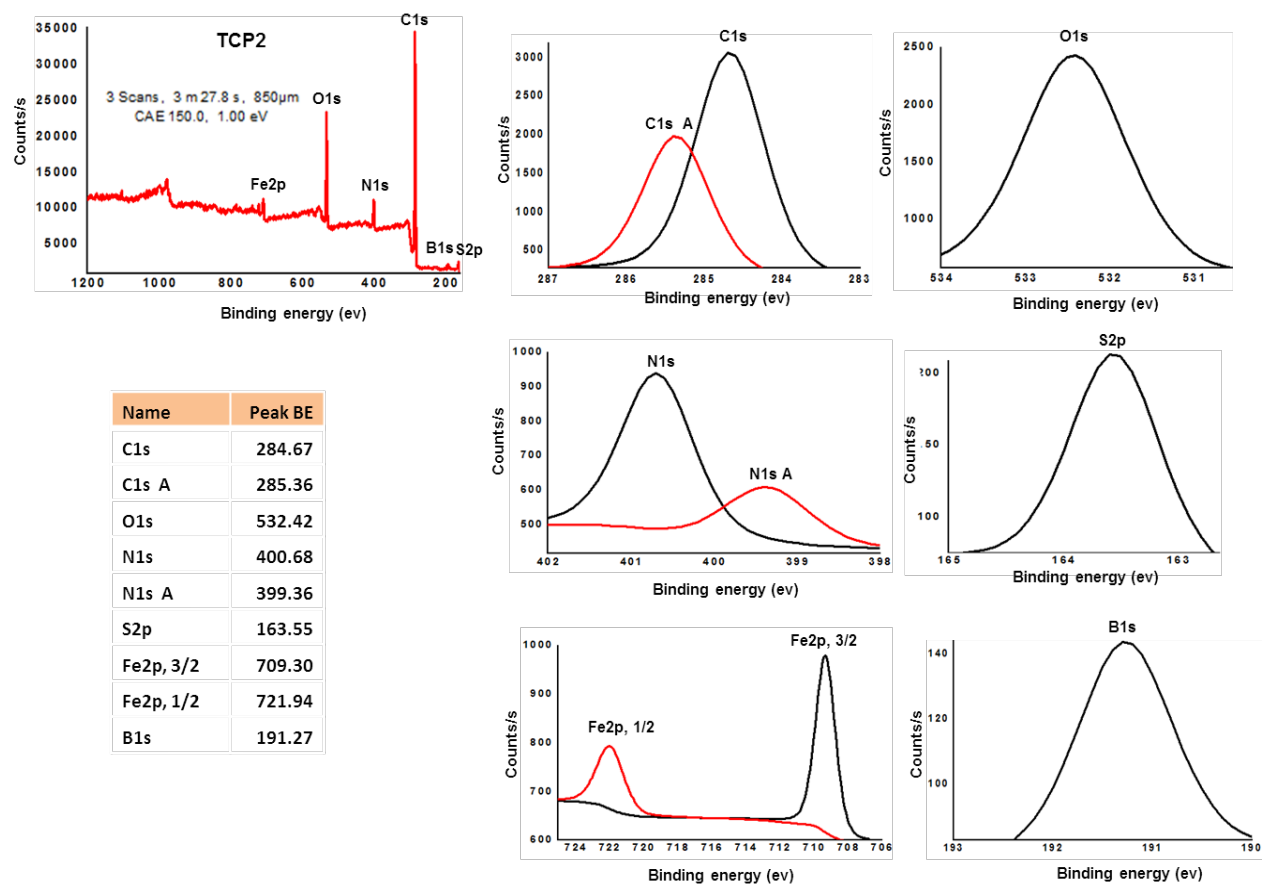

**Figure S26** High-resolution XPS spectra of C1s, O1s, N1s, S2p, Fe2p and B1s of TCP2

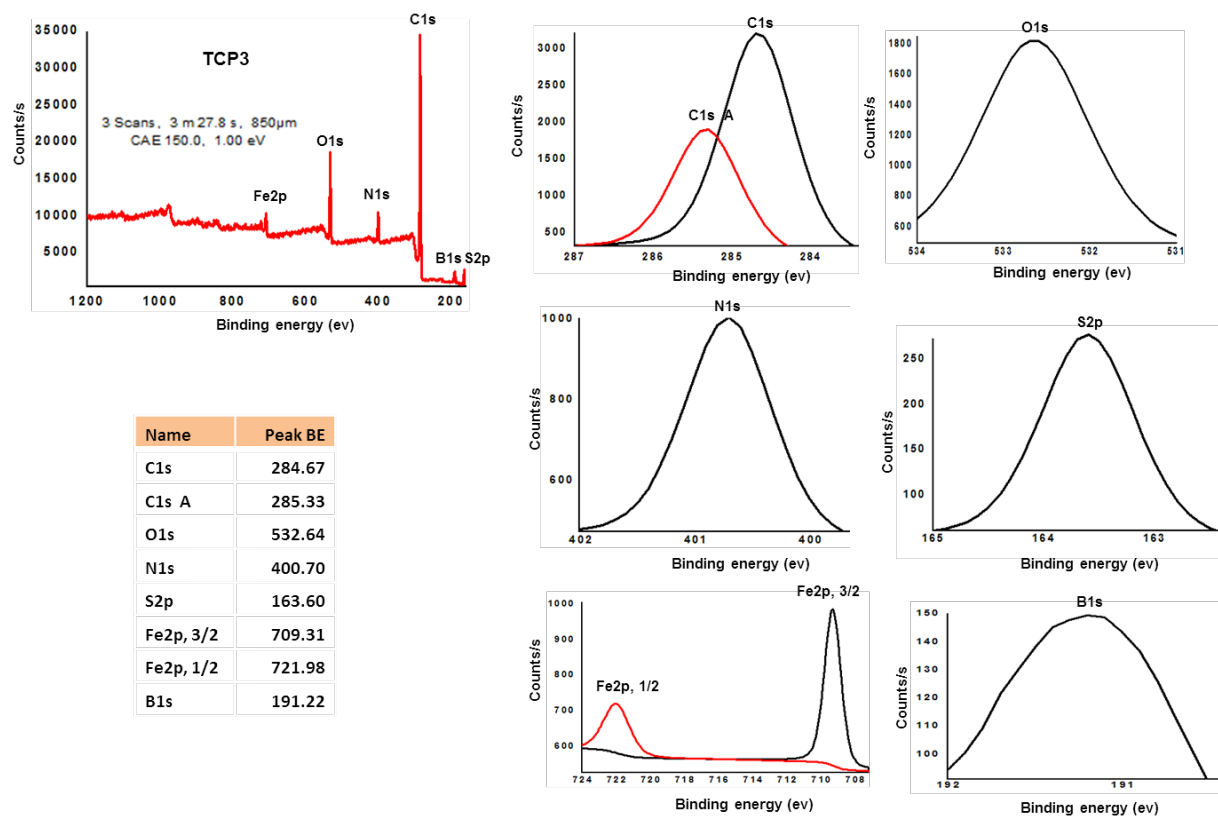

**Figure S27** High-resolution XPS spectra of C1s, O1s, N1s, S2p, Fe2p and B1s of **TCP3**



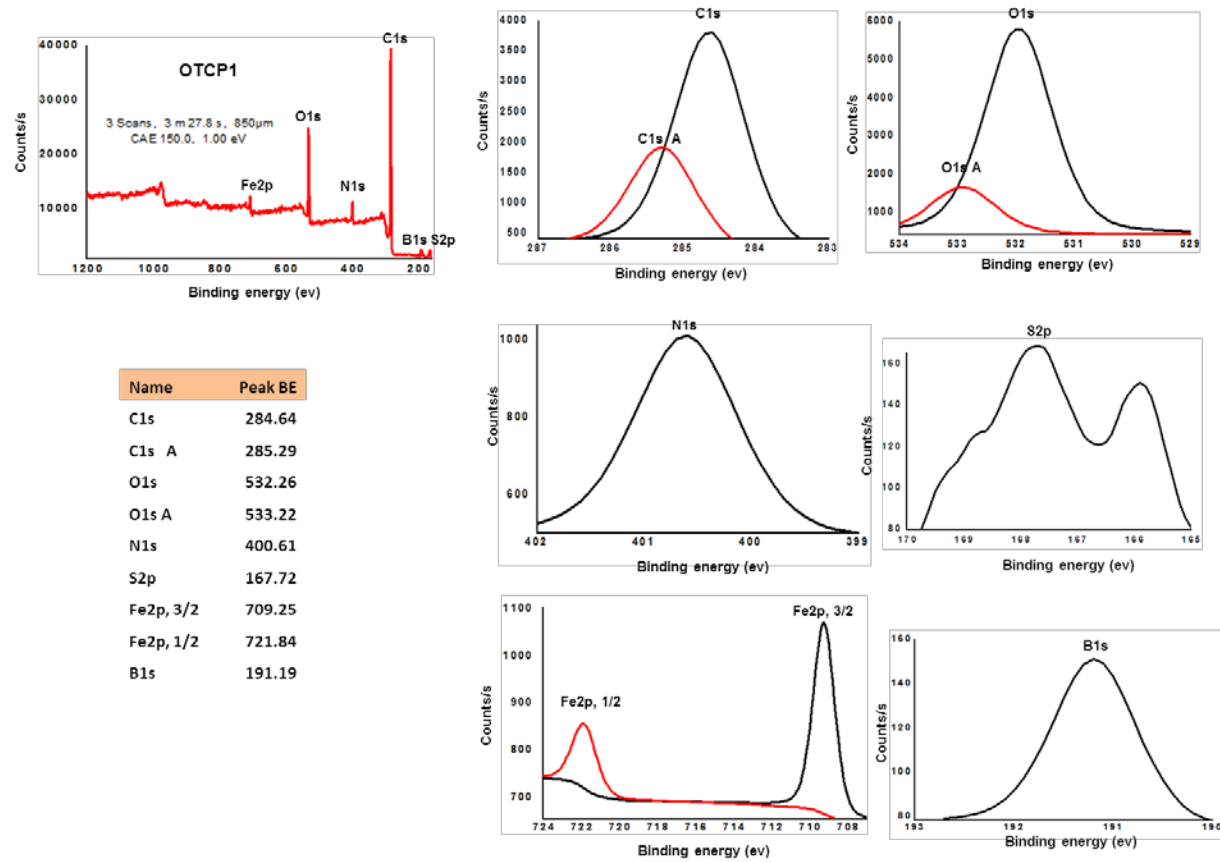

**Figure S28** High-resolution XPS spectra of C1s, O1s, N1s, S2p, Fe2p and B1s of **OTCP1**

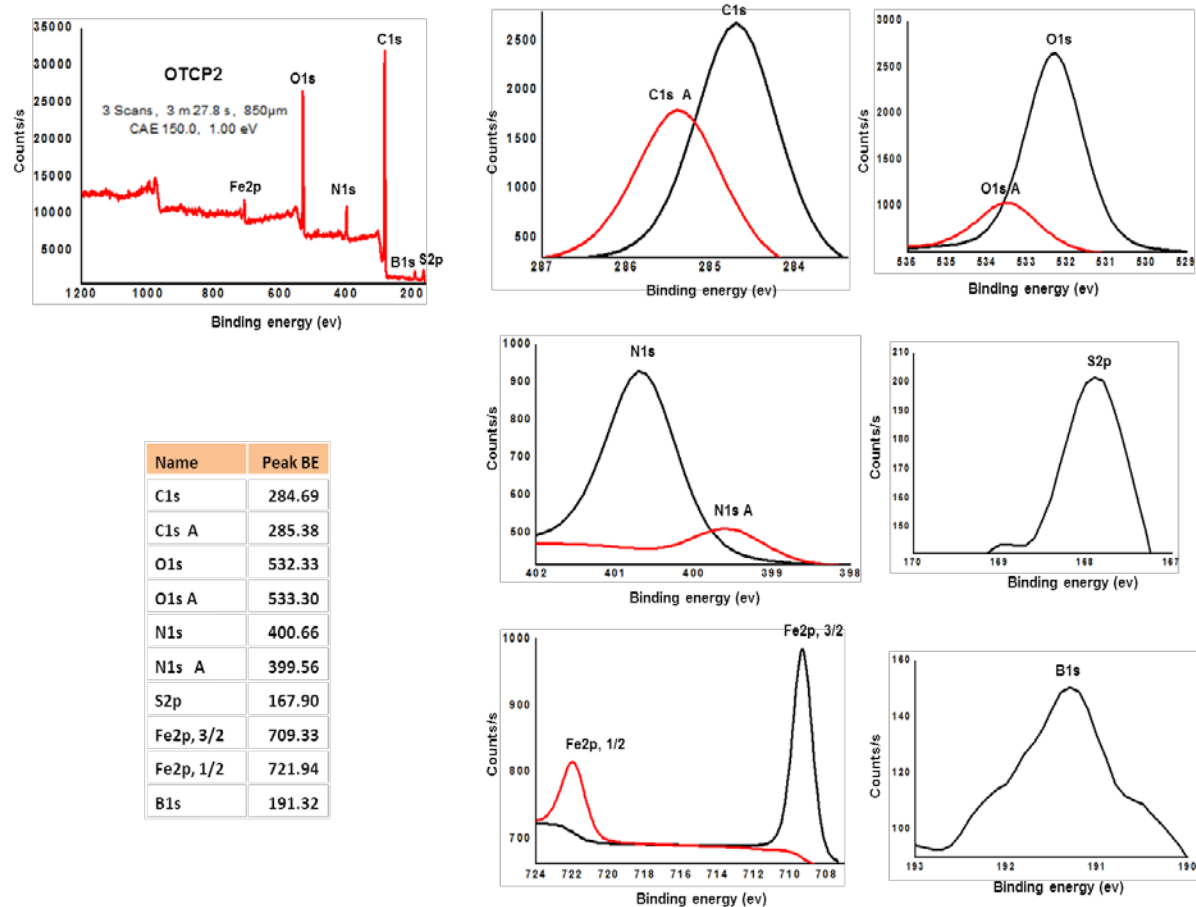

**Figure S29** High-resolution XPS spectra of C1s, O1s, N1s, S2p, Fe2p and B1s of **OTCP2**

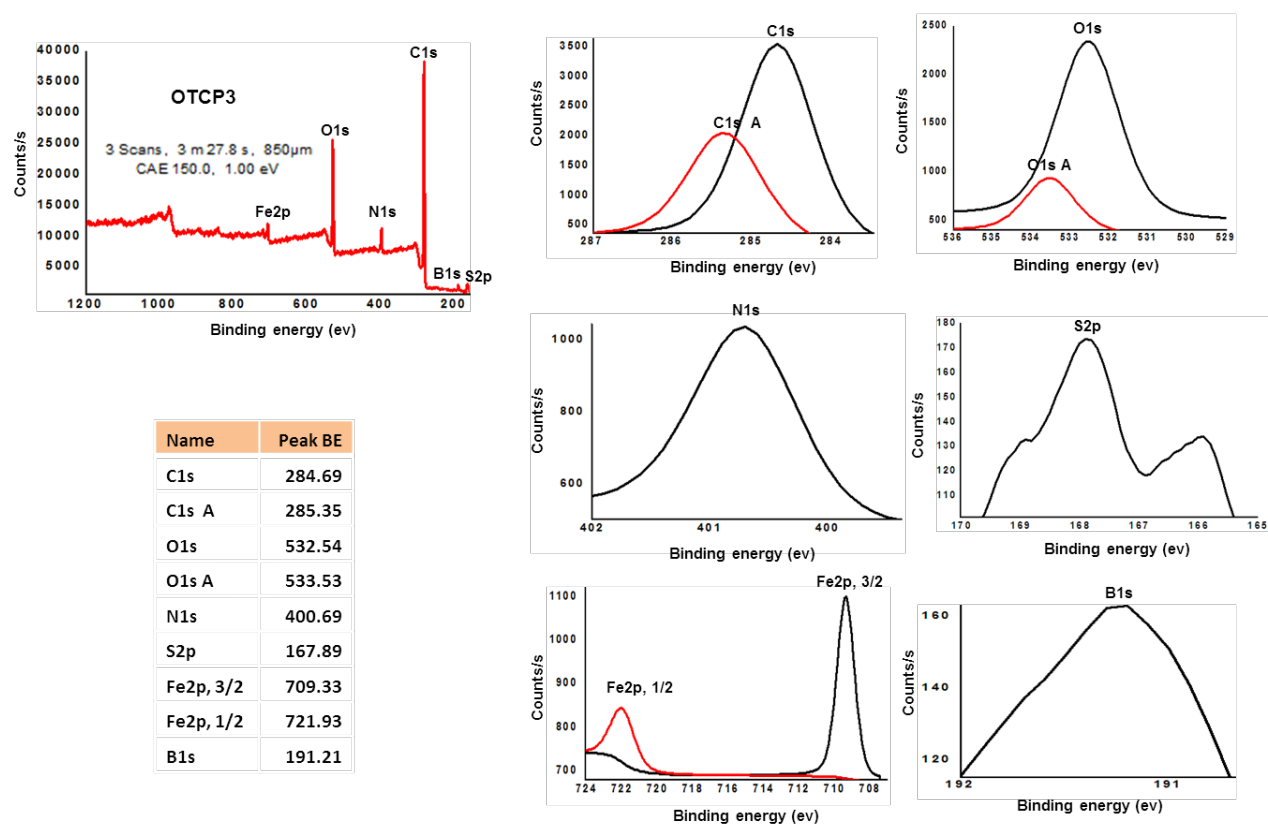

**Figure S30** High-resolution XPS spectra of C1s, O1s, N1s, S2p, Fe2p and B1s of **OTCP3**

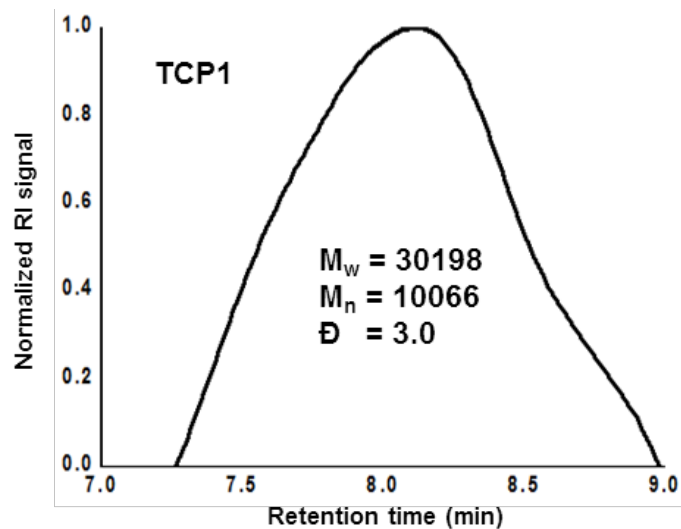

Figure S31 Normalized GPC chromatogram of TCP1

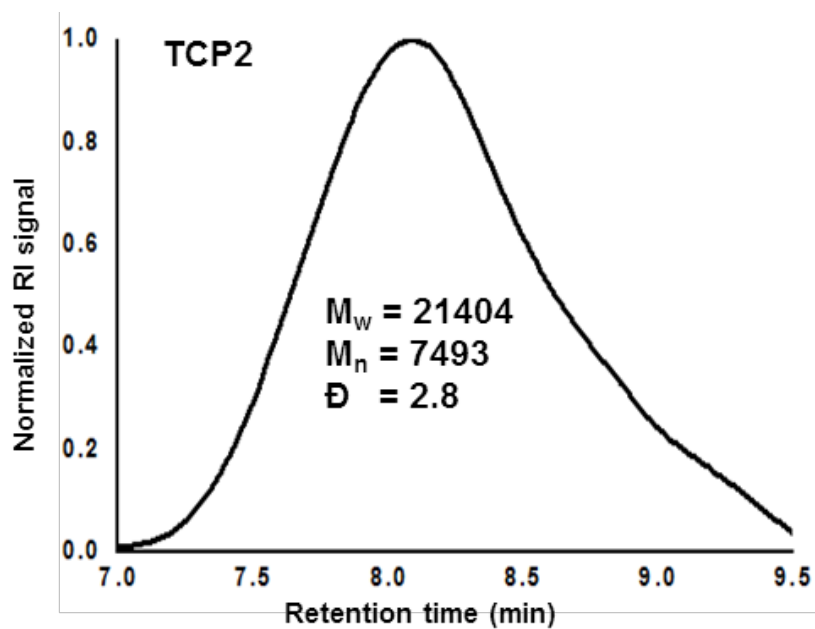

Figure S32 Normalized GPC chromatogram of TCP2

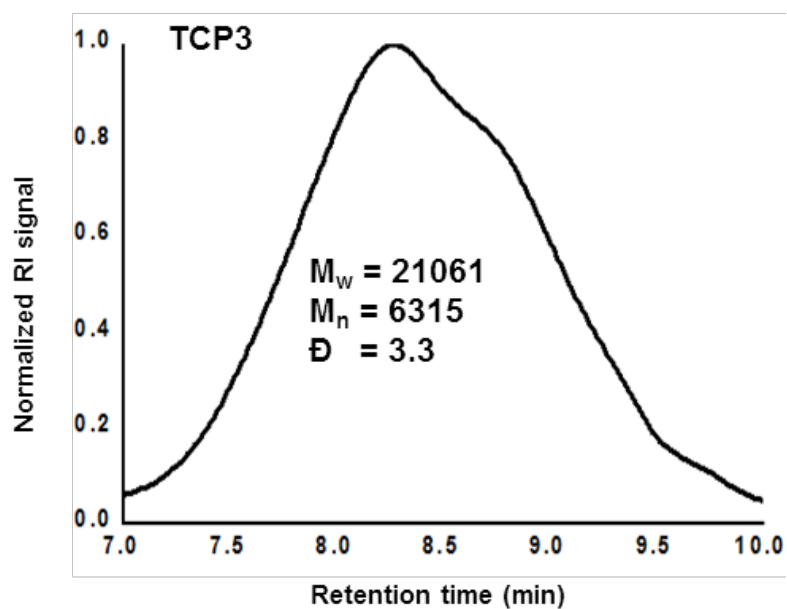

**Figure S33** Normalized GPC chromatogram of **TCP3**

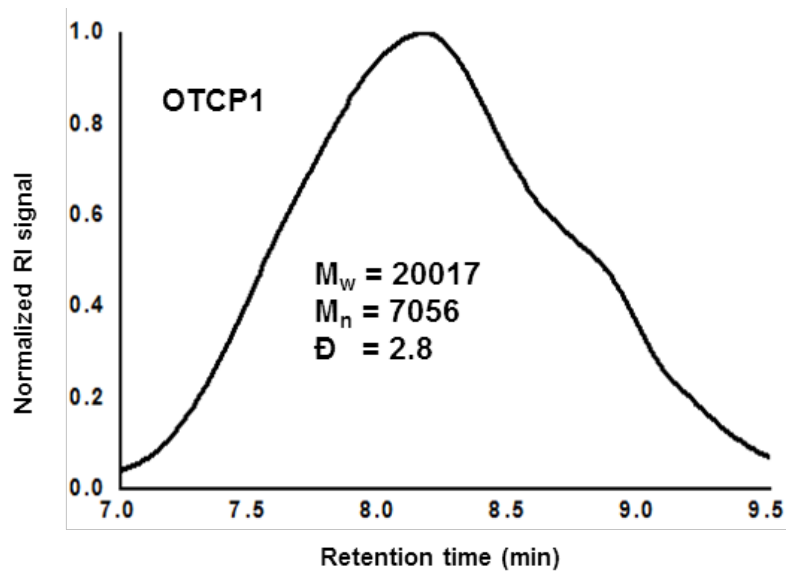

**Figures S34** Normalized GPC chromatogram of **OTCP1**

**Table S1** Summary of the Li<sup>+</sup> (200 mg L<sup>-1</sup>) adsorption by copolymers **TCP1-3**, **OTCP1-3**

| Entry | Polymer      | C <sub>o</sub> (mg L <sup>-1</sup> ) | Ce (mg L <sup>-1</sup> ) | q <sub>e</sub> (mg g <sup>-1</sup> ) |
|-------|--------------|--------------------------------------|--------------------------|--------------------------------------|
| 1     | <b>TCP1</b>  | 200                                  | 196.07                   | 3.93                                 |
| 2     | <b>TCP2</b>  | 200                                  | 190.88                   | 9.12                                 |
| 3     | <b>TCP3</b>  | 200                                  | 194.89                   | 5.11                                 |
| 4     | <b>OTCP1</b> | 200                                  | 186.78                   | 13.22                                |
| 5     | <b>OTCP2</b> | 200                                  | 182.12                   | 17.88                                |
| 6     | <b>OTCP3</b> | 200                                  | 185.54                   | 14.46                                |

**Table S2** Comparison of adsorption capacity of **OTCP2** with published adsorbents for Li<sup>+</sup>

| Entry | Adsorbents         | Adsorption Capacity (mg g <sup>-1</sup> ) | Reference |
|-------|--------------------|-------------------------------------------|-----------|
| 1     | Li/Rb-IHPS         | 0.166                                     | [1]       |
| 2     | MWCNT–HDB14C4–COOH | 2.11                                      | [2]       |
| 3     | SG/GO composite    | 1.1                                       | [3]       |
| 4     | <b>OTCP2</b>       | 2.31                                      | This work |

**Table S3** Comparison of adsorption capacity of **OTCP2** with published adsorbents for MEB

| Entry | Adsorbents                                     | Adsorption Capacity (mg g <sup>-1</sup> ) | Reference |
|-------|------------------------------------------------|-------------------------------------------|-----------|
| 1     | ZIF-67-0.2 HPW                                 | 446                                       | [4]       |
| 2     | CS/GO aerogel                                  | 437                                       | [5]       |
| 3     | Graphene aerogel materials                     | 221.77                                    | [6]       |
| 4     | Composite graphene oxide/nanocellulose aerogel | 111.2                                     | [7]       |
| 5     | <b>OTCP2</b>                                   | 480.77                                    | This work |

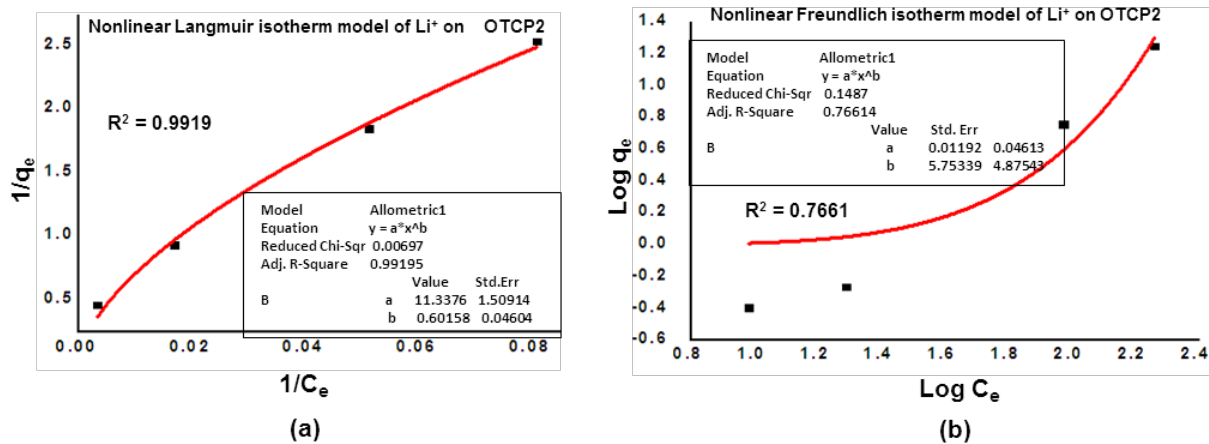

**Figure S35** Nonlinear Langmuir isotherm (a) and nonlinear Freundlich isotherm (b) models of Li<sup>+</sup> on **OTCP2**

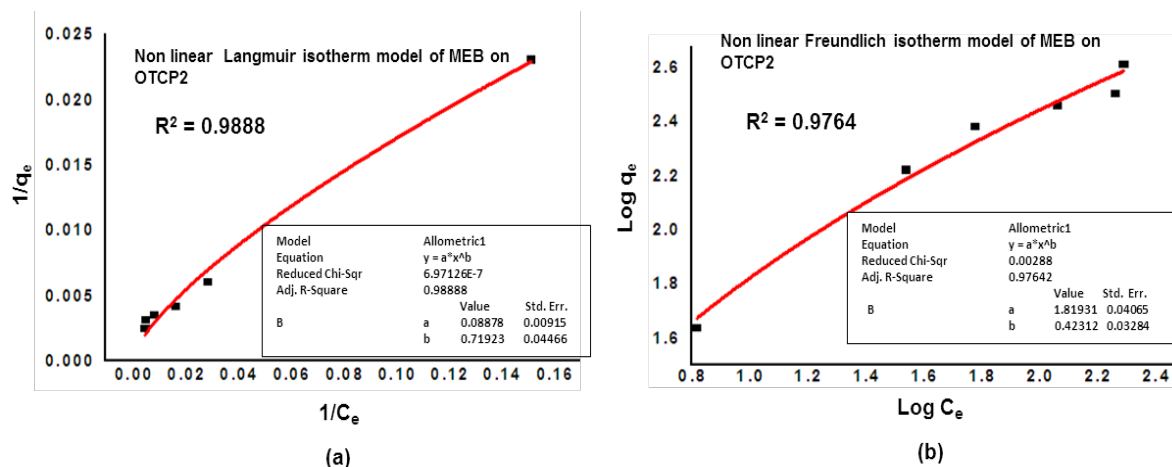

**Figure S36** Nonlinear Langmuir isotherm (a) and nonlinear Freundlich isotherm (b) models of MEB on OTCP2

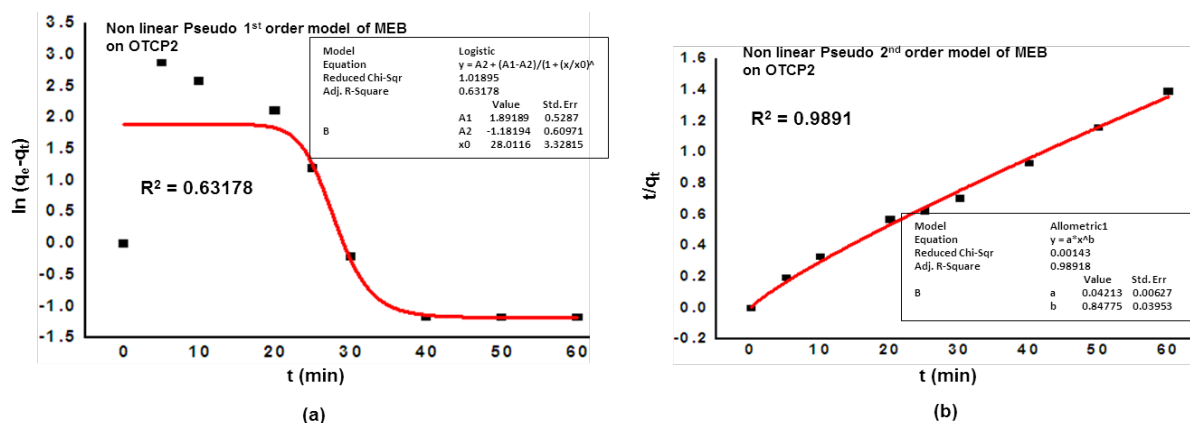

**Figure S37** Nonlinear Pseudo first-order (a) and nonlinear Pseudo second-order (b) models of MEB on OTCP2



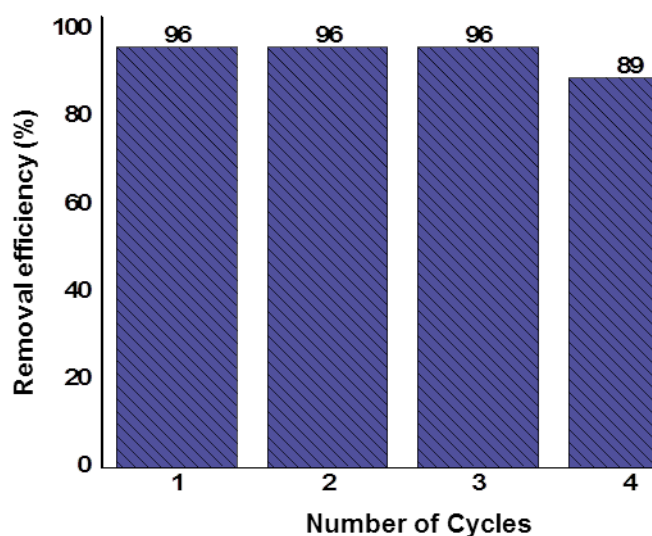

**Figure S38** Graphical representation of regeneration capacity of **OTCP2** for the adsorption of methylene blue

## References

1. Bai, H.; Xue, C.; Lyu, J.L.; Li, J.; Chen, G.X.; Yu, J.H.; Lin, C.T.; Lv, D.J.; Xiong, L.M. Thermal conductivity and mechanical properties of flake graphite/copper composite with a boron carbide-boron nano-layer on graphite surface. *Composites Part A: Applied Science and Manufacturing* **2018**, *106*, 42-51, doi:<https://doi.org/10.1016/j.compositesa.2017.11.019>.
2. Torrejos, R.E.C.; Nisola, G.M.; Park, M.J.; Shon, H.K.; Seo, J.G.; Koo, S.; Chung, W.-J. Synthesis and characterization of multi-walled carbon nanotubes-supported dibenzo-14-crown-4 ether with proton ionizable carboxyl sidearm as Li<sup>+</sup> adsorbents. *Chemical Engineering Journal* **2015**, *264*, 89-98, doi:<https://doi.org/10.1016/j.cej.2014.11.036>.
3. Ding, T.; Wu, Q.; Nie, Z.; Zheng, M.; Wang, Y.; Yang, D. Selective recovery of lithium resources in salt lakes by polyacrylonitrile/ion-imprinted polymer: Synthesis, testing, and computation. *Polymer Testing* **2022**, *113*, 107647, doi:<https://doi.org/10.1016/j.polymertesting.2022.107647>.
4. Wei, S.; Wu, J.; Chen, P.; Fu, B.; Zhu, X.; Chen, M. Integration of Phosphotungstic Acid into Zeolitic Imidazole Framework-67 for Efficient Methylene Blue Adsorption. *ACS Omega* **2022**, *7*, 9900-9908, doi:[10.1021/acsomega.2c00377](https://doi.org/10.1021/acsomega.2c00377).
5. Xu, W.; Li, Y.; Wang, H.; Du, Q.; Li, M.; Sun, Y.; Cui, M.; Li, L. Study on the Adsorption Performance of Casein/Graphene Oxide Aerogel for Methylene Blue. *ACS Omega* **2021**, *6*, 29243-29253, doi:[10.1021/acsomega.1c04938](https://doi.org/10.1021/acsomega.1c04938).
6. Trinh, T.; Phuong, T.; Xuan, N.; Nguyet, D.M.; Quan, T.H.; Anh, T.N.M.; Thinh, D.B.; Tai, L.T.; Lan, N.T.; Trinh, D.N.; et al. Preparing three-dimensional graphene aerogels by chemical reducing method: Investigation of synthesis condition and optimization of adsorption capacity of organic dye. *Surfaces and Interfaces* **2021**, *23*, 101023, doi:<https://doi.org/10.1016/j.surfin.2021.101023>.

7. Wang, Z.; Song, L.; Wang, Y.; Zhang, X.-F.; Yao, J. Construction of a hybrid graphene oxide/nanofibrillated cellulose aerogel used for the efficient removal of methylene blue and tetracycline. *Journal of Physics and Chemistry of Solids* **2021**, *150*, 109839, doi:<https://doi.org/10.1016/j.jpcs.2020.109839>.
